# Supplementary material for: Different magnetic responses observed in CoII4, CoII3 and CoII1-based MOFs
Source: Royal Society of Chemistry journal article supplement (doi:10.1039/c6dt01587e), 2016-01-01
Supplement: c6dt01587e1.pdf [file c6dt01587e1.pdf]

## Supporting information

### Different magnetic responses observed in $\text{Co}^{\text{II}}_4$ , $\text{Co}^{\text{II}}_3$ and $\text{Co}^{\text{II}}_1$ -based MOFs

Chao Zhang,<sup>a</sup> Zhong-Yi Liu,<sup>a</sup> Ning Liu,<sup>a</sup> Hong Zhao,<sup>a</sup> En-Cui Yang<sup>\*a</sup> and Xiao-Jun Zhao<sup>\*a, b</sup>

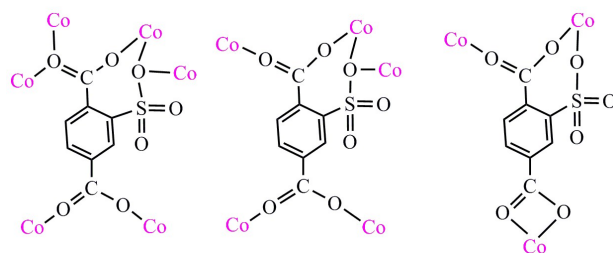

**Scheme S1** Binding modes of  $\text{stp}^{3-}$  ligand in **1–4**.

**Table S1.** Selected bond lengths (Å) and angles (°) for **2**<sup>a</sup>

|                                              |            |                                              |           |
|----------------------------------------------|------------|----------------------------------------------|-----------|
| Co(1)–O(1) <sup>#1</sup>                     | 2.083(2)   | Co(1)–N(3)                                   | 2.031(2)  |
| Co(2)–O(2)                                   | 2.165(2)   | Co(2)–O(3) <sup>#4</sup>                     | 2.068(2)  |
| Co(2)–O(5)                                   | 2.182(2)   | Co(2)–O(8)                                   | 2.069(2)  |
| Co(2)–O(8) <sup>#5</sup>                     | 2.072(2)   | Co(2)–N(1)                                   | 2.085(2)  |
| Co(3)–O(1) <sup>#6</sup>                     | 2.224(2)   | Co(3)–O(4) <sup>#7</sup>                     | 2.014(2)  |
| Co(3)–O(5) <sup>#5</sup>                     | 2.305(2)   | Co(3)–O(8)                                   | 2.004(2)  |
| Co(3)–O(9W)                                  | 2.190(5)   | Co(3)–N(2)                                   | 2.059(2)  |
| O(1) <sup>#1</sup> –Co(1)–O(1) <sup>#2</sup> | 131.18(12) | N(3)–Co(1)–O(1) <sup>#1</sup>                | 99.95(9)  |
| N(3)–Co(1)–O(1) <sup>#2</sup>                | 112.89(9)  | N(3) <sup>#3</sup> –Co(1)–N(3)               | 94.36(13) |
| O(2)–Co(2)–O(5)                              | 92.03(8)   | O(3) <sup>#4</sup> –Co(2)–O(2)               | 96.87(8)  |
| O(3) <sup>#4</sup> –Co(2)–O(5)               | 85.03(8)   | O(3) <sup>#4</sup> –Co(2)–O(8) <sup>#5</sup> | 97.12(8)  |
| O(8)–Co(2)–O(2)                              | 83.10(8)   | O(3) <sup>#4</sup> –Co(2)–N(1)               | 93.08(9)  |
| O(8)–Co(2)–O(5)                              | 92.39(8)   | O(8) <sup>#5</sup> –Co(2)–O(5)               | 79.62(8)  |
| O(8)–Co(2)–O(8) <sup>#5</sup>                | 82.49(8)   | O(8)–Co(2)–N(1)                              | 89.50(9)  |
| O(8) <sup>#5</sup> –Co(2)–N(1)               | 97.21(9)   | N(1)–Co(2)–O(2)                              | 91.63(9)  |
| O(4) <sup>#7</sup> –Co(3)–O(1) <sup>#6</sup> | 98.32(8)   | O(4) <sup>#7</sup> –Co(3)–O(5) <sup>#5</sup> | 82.34(8)  |
| O(4) <sup>#7</sup> –Co(3)–O(9W)              | 81.98(15)  | O(8)–Co(3)–O(1) <sup>#6</sup>                | 92.39(8)  |
| O(8)–Co(3)–O(4) <sup>#7</sup>                | 96.82(8)   | O(8)–Co(3)–O(5) <sup>#5</sup>                | 78.10(7)  |
| O(8)–Co(3)–N(2)                              | 93.63(9)   | O(9W)–Co(3)–O(1) <sup>#6</sup>               | 79.88(15) |
| O(9W)–Co(3)–O(5) <sup>#5</sup>               | 109.60(14) | N(2)–Co(3)–O(1) <sup>#6</sup>                | 100.04(9) |
| N(2)–Co(3)–O(5) <sup>#5</sup>                | 81.43(8)   | N(2)–Co(3)–O(9W)                             | 90.18(15) |

<sup>a</sup> Symmetry codes: #1  $x, 1 - y, z - 1/2$ ; #2  $-x, 1 - y, -z$ ; #3  $-x, y, -1/2 - z$ ; #4  $1 - x, y, 1/2 - z$ ; #5  $-x, -y, -z$ ; #6  $-x, y, 1/2 - z$ ; #7  $-1 + x, -y, z - 1/2$ .

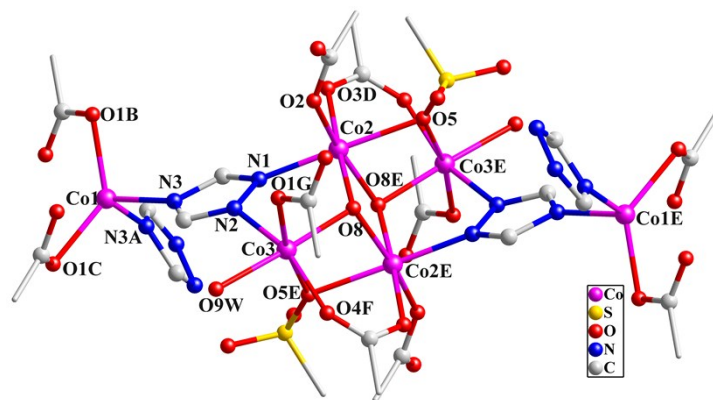

(a)

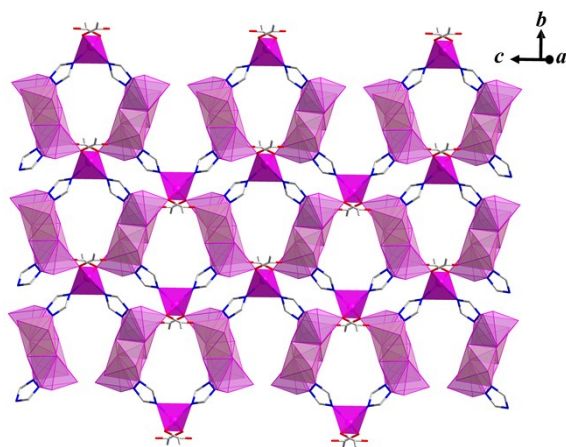

(b)

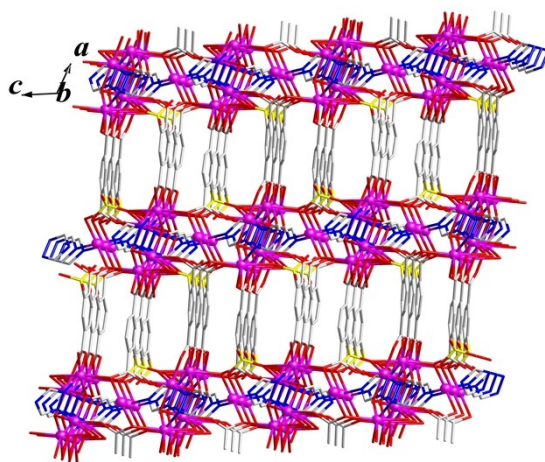

(c)

**Fig. S1** (a) Local coordination environments of  $\text{Co}^{\text{II}}$  ions in **2** (H atoms were omitted for clarity. Symmetry codes: A =  $-x, y, -1/2 - z$ ; B =  $x, 1 - y, z - 1/2$ ; C =  $-x, 1 - y, -z$ ; D =  $1 - x, y, 0.5 - z$ ; E =  $-x, -y, -z$ ; F =  $x - 1, -y, z - 1/2$ ). (b) 2D layer of **2** constructed from  $\mu_3\text{-trz}^-$  extended  $\text{Co}^{\text{II}}_4$  and  $\text{Co}^{\text{II}}_1$  subunits. (c) Pillared-layer framework of **2**.

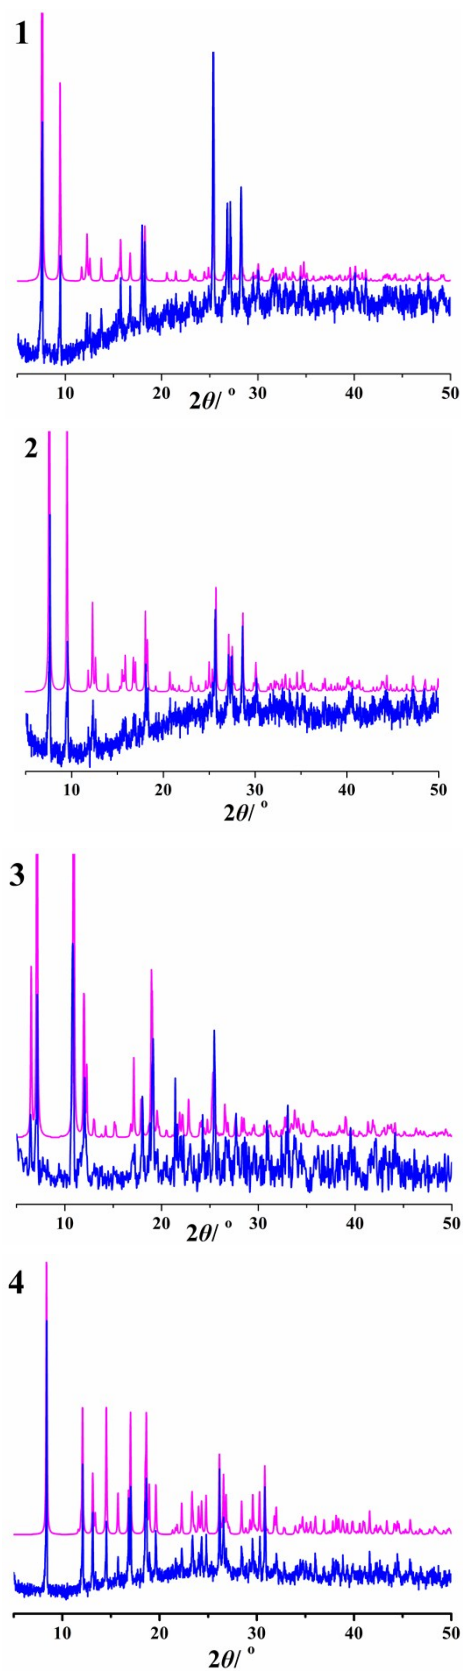

**Fig. S2** Simulated (purple) and experimental (blue) X-ray powder diffraction patterns for **1–4**.

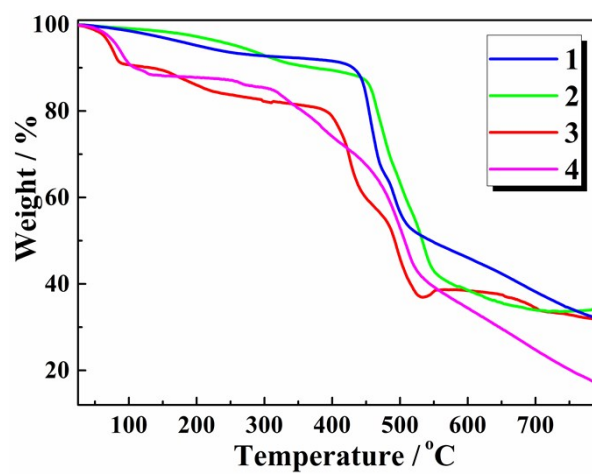

Fig. S3 TG curves for 1–4.

**Table S2.** Geometric parameters (Å, deg) for the sununit of **1**

| Pathway | Linkages                                              | $r_{\text{Co}\cdots\text{Co}}$ | $\angle\text{CoOCO}$    |
|---------|-------------------------------------------------------|--------------------------------|-------------------------|
| $J_1$   | $\mu_3\text{-OH}^-$                                   | 3.1501(3)                      | 98.356(6)               |
| $J_2$   | $\mu_3\text{-OH}^-$<br>-NN-                           | 3.4409(4)                      | 114.638(7)              |
| $J_3$   | $\mu_3\text{-OH}^-$<br>Single atom bridging sulfonate | 3.2183(4)                      | 104.355(6)<br>91.189(5) |
| $J_4$   | Single atom bridging carboxylate                      | 3.8788(4)                      | 123.704(98)             |
| $J_5$   | $\mu\text{-syn, anti-COO}^-$                          | 4.3416(4)                      |                         |

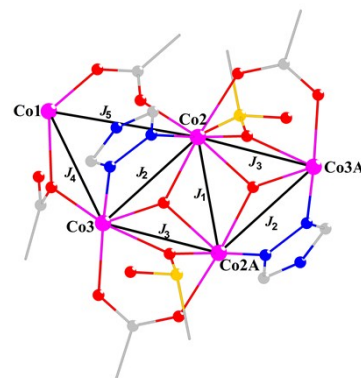

**Table S3.** Geometric parameters (Å, deg) for the sununits of **3**

| Pathway | Linkages                                              | $r_{\text{Co}\cdots\text{Co}}$ | $\angle\text{CoOCo}$ |  |
|---------|-------------------------------------------------------|--------------------------------|----------------------|--|
| $J_1$   | $\mu_3\text{-OH}^-$<br>$\mu_3\text{-OH}^-$            | 3.1723(18)                     | 98.3(2)              |  |
| $J_2$   | $\mu_3\text{-OH}^-$<br>-NN-                           | 3.5371(18)                     | 117.4(3)             |  |
| $J_3$   | $\mu_3\text{-OH}^-$<br>Single atom bridging sulfonate | 3.2177(15)                     | 101.1(2)<br>89.6(2)  |  |
| $J_4$   | $\mu\text{-syn, anti-COO}^-$                          | 5.3418(25)                     |                      |  |
| $J_1$   | $\mu_3\text{-OH}^-$<br>$\mu_3\text{-OH}^-$            | 3.1766(18)                     | 98.1(2)              |  |
| $J_2$   | $\mu_3\text{-OH}^-$<br>-NN-                           | 3.5584(18)                     | 117.7(3)             |  |
| $J_3$   | $\mu_3\text{-OH}^-$<br>Single atom bridging sulfonate | 3.2169(15)                     | 101.1(3)<br>89.8(2)  |  |
| $J_4$   | $\mu\text{-syn, anti-COO}^-$                          | 5.3484(25)                     |                      |  |

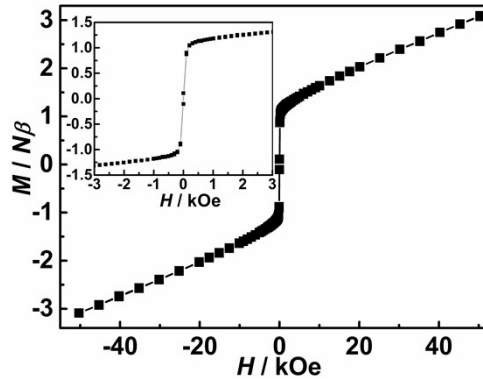

Fig. S4 Magnetic hysteresis loop for 1 measured at 2.0 K.
